RESEARCH ARTICLE

# Sex and Urbanicity Contribute to Variation in Lymphocyte Distribution across Ugandan Populations

Prossy Naluyima<sup>1,2</sup>, Leigh Anne Eller<sup>3,4</sup>, Benson J. Ouma<sup>1</sup>, Denis Kyabaggu<sup>1</sup>, Peter Kataaha<sup>5</sup>, David Guwatudde<sup>6</sup>, Hannah Kibuuka<sup>1</sup>, Fred Wabwire-Mangen<sup>1,6</sup>, Merlin L. Robb<sup>3,4</sup>, Nelson L. Michael<sup>3</sup>, Mark S. de Souza<sup>7</sup>, Johan K. Sandberg<sup>2</sup>, Michael A. Eller<sup>3,4\*</sup>

**1** Makerere University Walter Reed Project, Kampala, Uganda, **2** Center for Infectious Medicine, Department of Medicine, Karolinska Institutet, Karolinska University Hospital Huddinge, Stockholm, Sweden, **3** U.S. Military HIV Research Program, Walter Reed Army Institute of Research, Silver Spring, Maryland, United States of America, **4** Henry M. Jackson Foundation for the Advancement of Military Medicine, Bethesda, Maryland, United States of America, **5** Uganda National Blood Transfusion Service, Kampala, Uganda, **6** School of Public Health, Makerere University College of Health Sciences, Kampala, Uganda, **7** SEARCH, Thai Red Cross AIDS Research Center, Bangkok, Thailand

\* [meller@hivresearch.org](mailto:meller@hivresearch.org)

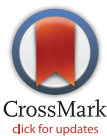

**OPEN ACCESS**

**Citation:** Naluyima P, Eller LA, Ouma BJ, Kyabaggu D, Kataaha P, Guwatudde D, et al. (2016) Sex and Urbanicity Contribute to Variation in Lymphocyte Distribution across Ugandan Populations. PLoS ONE 11(1): e0146196. doi:10.1371/journal.pone.0146196

**Editor:** Alash'le G. Abimiku, University of Maryland School of Medicine, UNITED STATES

**Received:** February 16, 2015

**Accepted:** December 14, 2015

**Published:** January 5, 2016

**Copyright:** This is an open access article, free of all copyright, and may be freely reproduced, distributed, transmitted, modified, built upon, or otherwise used by anyone for any lawful purpose. The work is made available under the [Creative Commons CC0](https://creativecommons.org/licenses/by/4.0/) public domain dedication.

**Data Availability Statement:** All relevant data are within the paper.

**Funding:** This work was supported by a cooperative agreement (W81XWH-11-2-0174) between the Henry M. Jackson Foundation for the Advancement of Military Medicine, Inc., and the U.S. Department of Defense (DoD). Additional support was provided by the Swedish Research Council, the Swedish Cancer Society, the Stockholm County Council, Karolinska Institutet, and the Division of Intramural Research, NIAID, NIH.

## Abstract

Management of patient care and interpretation of research data require evaluation of laboratory results in the context of reference data from populations with known health status to adequately diagnose disease or make a physiological assessment. Few studies have addressed the diversity of lymphocyte subsets in rural and urban Ugandan populations. Here, 663 healthy blood bank donors from semi-urban centers of Kampala consented to participate in a study to define lymphocyte reference ranges. Whole blood immunophenotyping was performed to determine the frequency and absolute counts of T, B, and NK cells using clinical flow cytometry. Results from blood bank donors were compared to a rural cohort from the district of Kayunga and more urban clinical trial participants from the capital city, Kampala. Relationships between hematological and lymphocyte parameters were also explored. In the semi-urban blood donors, females were significantly different from males in all parameters except the frequency of CD8 T and B cells. Females had higher absolute counts of CD4 T, CD8 T and B cells, whereas males had higher NK cell counts. NK cell frequency and counts were significantly higher in semi-urban blood donors, regardless of sex, compared to more urban study participants. CD8 T cell frequency and counts were significantly higher in the blood donors compared to the rural participants, irrespective of sex. Interestingly, basophil counts were positively associated with overall T cell counts. These findings suggest that both sex and level of cohort urbanicity may influence lymphocyte subset distributions in Ugandans.

**Competing Interests:** The authors have declared that no competing interests exist.

## Introduction

Sub-Saharan Africa suffers a disproportionately high burden of infectious and parasitic diseases. According to the 2012 World Health Organization (WHO) statistics report [1], Uganda has a high morbidity (incidence rate per 100,000 population) compared to the rest of Africa, for the three major infectious diseases (HIV/AIDS, malaria and tuberculosis). Clinical trials to assess new or improved preventive and therapeutic treatments are increasingly being conducted in this region [2]. Relevant clinical laboratory lymphocyte reference intervals are important to adequately support clinical management of patients, endpoint evaluation of vaccines and other therapeutic studies, as well as accurate characterization of adverse events observed during the course of a clinical trial. Due to insufficient healthcare infrastructure, Africa is still largely dependent on technology from western countries and limited by transference of clinical laboratory reference ranges not evaluated for the relevant populations.

People living with HIV require regular monitoring of peripheral blood lymphocytes, specifically CD4 T cell frequency and absolute counts, in order to inform treatment decisions [3]. Population-specific reference ranges for lymphocyte subsets in healthy volunteers, needed to highlight lymphocyte abnormalities, remain poorly characterized for Uganda. To date there have been no published reports of percentage and absolute numbers of B cell and natural killer (NK) cell lymphocytes in Ugandan populations. Previous studies involved small sample sizes, were done in distinct rural populations, or did not evaluate all the major lymphocyte subsets [4–6]. Using four-color flow cytometry, we determined clinical laboratory lymphocyte reference ranges in healthy Ugandan blood bank donors because they were more likely to be healthy persons at low risk for infectious diseases, and representative of the Ugandan population. However, more advanced phases of clinical trials may involve thousands of participants from different regions of Uganda to account for pathogen transmission probability [7] and also meet sample size targets. We have previously shown that unrelated hematological reference intervals increase the cost and workload of conducting human vaccine trials [8]. Additionally, studies comparing hematological parameters in African show some variability across different populations [9]. We thus compared the clinical laboratory lymphocyte ranges ascertained from healthy blood bank donors from the semi-urban centers of Kampala, to vaccine study participants from urban centers in Kampala, and cohort study participants from the rural district of Kayunga, to assess how well the currently used ranges represented these three cohorts [10].

This study establishes the reference ranges for the percentages and absolute counts of T, B, and NK cell values in anonymous, healthy, adult Ugandan blood bank donors in the Kampala region. In addition, the blood bank interval values were compared to other Ugandan populations used for clinical studies to identify potential differences and determine factors associated with lymphocyte and hematological variability.

## Materials and Methods

Between 2005 and 2006 Makerere University Walter Reed Project (MUWRP) collected residual blood from blood bank participants to establish laboratory lymphocyte reference ranges in a study RV164: “Determination of Clinical Research Reference Ranges Using Anonymous Healthy Ugandan Blood Bank Donors” [8]. Participants in the blood bank study were anonymous Ugandan blood donors recruited from a 50km radius around the capital city of Kampala (considered semi-urban), and were over 18 years of age, with no significant medical history, met the blood bank definition of healthy [11] and were low risk for sexually transmitted diseases. The study received approval from institutional review boards both in Uganda and the United States. The Walter Reed Army Institute of Research (WRAIR) IRB, and the following local Institutional Review Boards approved by the Uganda National Council for Science and

Technology (FWA 00001293) approved the conduct of these studies, as specified, including approval of the written informed consent form as per individual study: HIV/AIDS Research Committee/National AIDS Research Committee IRB (FWA IRB00001515) for Protocols RV156, RV172 and RV173; and the Makerere University Faculty of Medicine IRB (FWA IRB00007568) for RV164. All study participants gave written informed consent. Age, sex, date and time of collection, and regional center were the only patient identifiers provided with the blood samples.

Residual blood from blood collection tubing was harvested into EDTA vacutainer tubes and transported at ambient temperature on the same day to the College of American Pathologists (CAP) accredited MUWRP laboratory. All samples were processed within 8 hours of collection. Whole blood was stained with either CD3 FITC, CD8 PE, CD45 PerCP and CD4 APC four-color monoclonal antibody Multitest™ cocktail, or CD3 FITC, CD16+56 PE, CD45 PerCP and CD19 APC Multitest™ cocktail in BD Trucount™ tubes (Multitest™ kits, Becton Dickinson Biosciences, San Jose, California) to enumerate T cell, B cell, and NK cell subsets. Each BD Trucount™ tube was incubated for 15 minutes at room temperature in the dark and then 450 µl of 10% FACS Lysing solution (BD Biosciences) was used to lyse the red blood cells for 15 minutes in the dark. Samples were analyzed on a 2-laser FACSCalibur using MultiSet software (all from BD Biosciences, San Jose, California). The procedure was quality controlled using commercial reagents at two CD4 T cell count levels, CD Chex Normal and Low standards (Streck laboratories, Omaha, Nebraska), alongside each batch of samples. In parallel, EDTA anticoagulated blood was used for hematology testing using the Coulter Act5 diff (Beckman Coulter, Fullerton, California) giving a complete blood count with a five-part differential.

Whole blood collected in serum separation tubes was used for HIV, Hepatitis B (Hep B) and Hepatitis C (Hep C) screening as previously described [8]. Briefly, HIV-1 diagnostics was performed using Genetic Systems rLAV ELISA (BioRad Laboratories, Redmond, Washington). Reactive samples were retested with Vironostika HIV-1 Microelisa Systems (Organon Teknika, Durham, North Carolina), and if reactive, confirmed using the Genetic Systems HIV-1 Western Blot (BioRad Laboratories, Redmond, Washington). Hep B diagnostics was performed using the Genetic Systems HBsAg EIA 3.0 (BioRad Laboratories, Redmond, Washington) and confirmed using the Genetic Systems Confirmatory Assay 3.0 (BioRad Laboratories, Redmond, Washington). Anti-Hep C antibody was detected using the Ortho HCV Version 3.0 ELISA Tests System, and confirmed with Chiron RIBA HCV 3.0 SIA (Chiron Corporation, Emeryville, California). Serum pregnancy testing was performed on all females using Wampole Pre-Vue hCG cassettes (Wampole Laboratories, Inc Dist., Princeton, New Jersey). Individuals with evidence of disease or who were reactive for any of the above tests were not included in this study.

To assess if laboratory results from blood bank participants were comparable to results from communities where participants for clinical studies were recruited, we compared lymphocyte and hematological ranges determined from the blood bank study to results from participants in three clinical studies: (a) RV156: “A Phase I Clinical Trial to Evaluate the Safety and Immunogenicity of a Multiclade HIV-1 DNA Plasmid Vaccine, VRC-HIVDNA009-00-VP, in Uninfected Adult Volunteers in Uganda” [12], (b) RV172: “A Phase I/II Clinical Trial to Evaluate the Safety and Immunogenicity of a Multiclade HIV-1 DNA Plasmid Vaccine, VRC-HIVDNA016-00-VP, Boosted by a Multiclade HIV-1 Recombinant Adenovirus-5 Vector Vaccine, VRC-HI-VADV014-00-VP in HIV Uninfected Adult Volunteers in East Africa” [13], and (c) RV173: “Cohort Development for a Possible Phase III HIV Vaccine Trial Among the Population Aged 15–49 years of Kayunga District, Uganda” [14, 15]. Participants from the two vaccine trials were healthy Ugandans aged 18 to 50 years from Kampala (a 20km radius from the center of Kampala, considered urban) who were at low risk for HIV infection and healthy according to a

physical exam. Pre-vaccination lymphocyte data from 126 RV156 screening participants and 144 RV172 study enrollees were used. Cohort study participants from Kayunga, a rural Ugandan district, were healthy individuals aged 18 to 49 years. Climate and environmental conditions, with the exception of urbanicity, were quite similar between the two Kampala study groups and the Kayunga cohort, approximately 110 km northeast of Kampala. In all studies participants were negative for HIV, Hep B, Hep C and syphilis infection, had no abnormal clinical chemistry or hematology results, and were not pregnant (for the females). Hematological and lymphocyte analysis was performed in the same CAP accredited MUWRP laboratory, using the same methodology as was done for the blood bank study described above [12–15].

Statistical analysis was performed using Graph Pad Prism version 6.0a for Mac OSX (GraphPad Software, La Jolla, California). To determine a reference range interval that included 95% of the population, the values between the 2.5% and 97.5% limits were calculated after excluding those reactive for the tests listed above. The results were stratified by gender. A non-parametric Mann Whitney U test was used to determine any statistically significant differences between men and women. The non-parametric Kruskal-Wallis test, corrected for multiple comparisons using Dunn's test, was used to determine differences across study cohorts. The Spearman's rank correlation was used to assess associations between parameters, with  $\rho \geq 0.25$  considered to be biologically relevant. All p values  $< 0.05$  were considered statistically significant.

## Results

### Sample collection and cohort demographics

Six hundred and sixty three donors participating in regular national blood bank collection services on the outskirts of Kampala (a 50km radius) were recruited and included in the determination of reference ranges. 78% of the semi-urban blood bank donors were male with an age range of 18–56 years. The median age for males and females was 24 and 20 years, respectively (Table 1). The urban vaccine trial study participants were similarly distributed with 72% of the 270 participants being male, 18–49 years of age with a median of 25 and 26 years for males and females, respectively. The rural Kayunga cohort had a more balanced sex distribution with 51% of 246 participants being male, with a median of 24 and 29 years (range: 18–48) for males and females, respectively.

### Lymphocyte subsets differ by urbanicity and sex

The blood bank study recruited an adequate number of participants for each analyte, as suggested by the Clinical and Laboratory Standards Institute (CLSI) [16], and was therefore used to determine clinical laboratory lymphocyte subset mean, median and reference ranges (2.5–97.5 percentile) for both absolute cell counts and frequency of lymphocytes (Table 2). Females had significantly higher percentages than males for most lymphocyte parameters with the exception of the percentage of CD8 and B-cells that were similar. NK cell percentages on the other hand, were significantly higher in men (median of 14% compared to 11% in females,  $p < 0.001$ ). Similarly, women had significantly higher absolute cell counts than men of CD4 T cells (median of  $1010 \times 10^3$  versus  $877 \times 10^3$  cells/ $\mu\text{l}$ ,  $p < 0.001$ ), CD8 T cells (median of  $579 \times 10^3$  versus  $541 \times 10^3$  cells/ $\mu\text{l}$ ,  $p < 0.05$ ) and B cells (median of  $362 \times 10^3$  versus  $315 \times 10^3$  cells/ $\mu\text{l}$ ,  $p < 0.01$ ), whereas men had higher NK cell absolute counts (median of  $291 \times 10^3$  versus  $263 \times 10^3$  cells/ $\mu\text{l}$ ,  $p < 0.05$ ). These results reveal substantial sex associated differences in lymphocyte distribution of healthy Ugandans. It is noteworthy that some participants had CD4 T cell absolute counts below the WHO recommended threshold ( $< 500 \times 10^3$  cells/ $\mu\text{l}$ ) for initiating antiretroviral therapy in HIV infected persons [17].

**Table 1. Population demographics.**

| Population                 | Number | Dates Enrolled | Rural/Urban | Location | Gender Distribution (%)         | Age range Min-Max (Median)                       |
|----------------------------|--------|----------------|-------------|----------|---------------------------------|--------------------------------------------------|
| Blood bank donors          | 663    | 2005           | Semi-urban  | Kampala  | Male: 520 (78) Female: 143 (22) | Male: 18–56 (24) Female: 18–49 (20) <sup>a</sup> |
| Vaccine trial participants | 271    | 2005–2006      | Urban       | Kampala  | Male: 195 (72) Female: 76 (28)  | Male: 18–49 (25) Female: 18–47 (27)              |
| Cohort participants        | 246    | 2006           | Rural       | Kayunga  | Male: 125 (51) Female: 121 (49) | Male: 18–48 (24) Female: 18–47 (29)              |

Blood bank donors were used to establish lymphocyte reference ranges, while vaccine trial and cohort development participants were used for comparison.

<sup>a</sup>Females in this group were significantly younger than those of the other groups,  $p < 0.001$ .

doi:10.1371/journal.pone.0146196.t001

We next stratified the analysis by sex, and compared lymphocyte parameters across the three distinct cohorts. Urban male vaccine study participants had a significantly higher percentage of cells expressing CD3 (median of 73 versus 69%), and CD4 (median of 44 versus 40%), and CD4/CD8 ratio (median of 1.85 versus 1.61) compared to semi-urban male blood bank participants (Table 3,  $p < 0.001$ , respectively) but significantly lower percentage of NK cells (Table 3, median of 10 versus 14%,  $p < 0.001$ ) and lower absolute counts of cells expressing CD3 (median of  $1366 \times 10^3$  versus  $1506 \times 10^3$  cells/ $\mu$ l), CD8 T cells (median of  $488 \times 10^3$  versus  $541 \times 10^3$  cells/ $\mu$ l), NK cells (median of  $198 \times 10^3$  versus  $291 \times 10^3$  cells/ $\mu$ l), and B cells ([median of  $270 \times 10^3$  versus  $315 \times 10^3$  cells/ $\mu$ l], Table 3,  $p < 0.01$ ). Men in the rural Kayunga cohort study also had significantly higher percentages of CD4 T cells (median of 70 versus 69%) and CD4/CD8 ratio ([median of 1.81 versus 1.61],  $p < 0.05$ , respectively) but a significantly lower percentage

**Table 2. Lymphocyte ranges for blood bank donors in Kampala, Uganda.**

| Test                    | Female (n = 143) |              |                 | Male (n = 520) |              |                 | Combined (n = 663) |              |                 |
|-------------------------|------------------|--------------|-----------------|----------------|--------------|-----------------|--------------------|--------------|-----------------|
|                         | Median           | Mean (StDev) | 2.5–97.5% Range | Median         | Mean (StDev) | 2.5–97.5% Range | Median             | Mean (StDev) | 2.5–97.5% Range |
| CD3, %****              | 72               | 72 (5.6)     | 60.2–82         | 69             | 69 (7.5)     | 52–82           | 70                 | 69 (7.3)     | 53–82           |
| CD4, %****              | 43               | 43 (6.5)     | 32–55           | 40             | 40 (6.6)     | 28–54           | 41                 | 41 (6.7)     | 28–54           |
| CD8, %                  | 24               | 25 (5.8)     | 14–36           | 25             | 25 (5.9)     | 15–38           | 25                 | 25 (5.9)     | 15–37           |
| NK, %****               | 11               | 12 (4.4)     | 4–21            | 14             | 15 (7.2)     | 5–33            | 13                 | 14 (6.8)     | 5–32            |
| B, %                    | 14               | 15 (3.4)     | 9–23            | 14.5           | 15 (4.5)     | 7–24            | 14                 | 15 (4.4)     | 7–24            |
| CD3, cells/ $\mu$ l**** | 1747             | 1780 (554)   | 924–3160        | 1506           | 1569 (537)   | 786–2681        | 1535               | 1615 (547)   | 806–2955        |
| CD4, cells/ $\mu$ l**** | 1010             | 1062 (368)   | 463–2217        | 877            | 913 (335)    | 429–1558        | 899                | 945 (348)    | 430–1759        |
| CD8, cells/ $\mu$ l*    | 579              | 616 (246)    | 255–1276        | 541.5          | 578 (282)    | 243–1100        | 549                | 586 (275)    | 248–1147        |
| NK, cells/ $\mu$ l*     | 263              | 283 (133)    | 91–638          | 291            | 342 (204)    | 86–897          | 284                | 329 (193)    | 87–860          |
| B, cells/ $\mu$ l**     | 362              | 378 (142)    | 141–747         | 315.5          | 344 (155)    | 130–716         | 326                | 351 (153)    | 133–724         |
| CD4/CD8 ratio**         | 1.7              | 1.9 (0.7)    | 0.9–3.6         | 1.6            | 1.7 (1.3)    | 0.8–3           | 1.6                | 1.8 (1.2)    | 0.9–3.2         |

Females significantly different from males,

\* $p < 0.05$ ,

\*\* $p < 0.01$ ,

\*\*\*\* $p < 0.0001$ .

doi:10.1371/journal.pone.0146196.t002

**Table 3. Comparison of lymphocyte subset frequency and absolute counts in males.**

| Test                | Semi-Urban (n = 520) |              |                 | Urban (n = 195) |              |                 | Rural (n = 125) |              |                 | Significant Differences Between Groups |
|---------------------|----------------------|--------------|-----------------|-----------------|--------------|-----------------|-----------------|--------------|-----------------|----------------------------------------|
|                     | Median               | Mean (StDev) | 2.5–97.5% Range | Median          | Mean (StDev) | 2.5–97.5% Range | Median          | Mean (StDev) | 2.5–97.5% Range |                                        |
| CD3, %              | 69                   | 69 (7.5)     | 52–82           | 73              | 72 (6.8)     | 56–83           | 70              | 69 (7.7)     | 48–82           | ****SU vs U and ***U vs R              |
| CD4, %              | 40                   | 40 (6.6)     | 28–54           | 44              | 44 (6.6)     | 30–57           | 41              | 42 (6.9)     | 29–57           | ****SU vs U, *SU vs R, and *U vs R     |
| CD8, %              | 25                   | 25 (5.9)     | 15–38           | 25              | 25 (6.1)     | 14–39           | 23              | 25 (6.3)     | 12–36           | **SU vs R and *U vs R                  |
| NK, %               | 14                   | 15 (7.2)     | 5–33            | 10              | 11 (5.5)     | 5–29            | 13              | 14 (6.9)     | 4–31            | ****SU vs U and **U vs R               |
| B, %                | 15                   | 15 (4.5)     | 7–24            | 14              | 15 (4.3)     | 8–25            | 16              | 16 (4.1)     | 8–24            | ND                                     |
| CD3, cells/ $\mu$ l | 1506                 | 1569 (537)   | 786–2681        | 1366            | 1436 (426)   | 822–2644        | 1373            | 1434 (484)   | 668–2717        | **SU vs U and *SU vs R                 |
| CD4, cells/ $\mu$ l | 877                  | 913 (335)    | 429–1558        | 862             | 871 (260)    | 465–1469        | 847             | 875 (303)    | 393–1733        | ND                                     |
| CD8, cells/ $\mu$ l | 542                  | 578 (282)    | 243–1100        | 488             | 502 (193)    | 228–1036        | 455             | 489 (218)    | 190–971         | ***SU vs U and ****SU vs R             |
| NK, cells/ $\mu$ l  | 291                  | 342 (204)    | 86–897          | 198             | 232 (152)    | 69–609          | 259             | 291–249      | 68–583          | ****SU vs U, *SU vs R, and **U vs R    |
| B, cells/ $\mu$ l   | 316                  | 344 (155)    | 130–716         | 270             | 302 (143)    | 117–718         | 311             | 326 (137)    | 125–720         | ***SU vs U                             |
| CD4/CD8 ratio       | 1.6                  | 1.7 (1.3)    | 0.8–3.0         | 1.9             | 1.9 (0.6)    | 0.8–3.3         | 1.8             | 2.0 (0.7)    | 0.9–3.9         | ***SU vs U and ***SU vs R              |

Males002C SU = Semi-Urban, U = Urban, R = Rural,

\*p<0.05,

\*\*p<0.01,

\*\*\*p<0.001,

\*\*\*\*p<0.0001,

ND = no difference.

The non-parametric Kruskal-Wallis test, corrected for multiple comparisons using Dunn's test, was used to determine differences across groups.

doi:10.1371/journal.pone.0146196.t003

of CD8 T cells (median of 23 versus 25%). Furthermore, they had lower absolute counts of CD3-expressing cells ( $1373 \times 10^3$  versus  $1506 \times 10^3$  cells/ $\mu$ l), CD8 T cells (median of  $455 \times 10^3$  versus  $541 \times 10^3$  cells/ $\mu$ l) and NK cells ([median of  $259 \times 10^3$  versus  $291 \times 10^3$  cells/ $\mu$ l],  $p < 0.05$  respectively) than the semi-urban male blood bank participants. Urban male vaccine study participants had significantly higher T cell percentages than men in the rural Kayunga cohort study, but significantly lower NK cell percentage and absolute count (Table 3;  $p < 0.01$ ).

Interestingly, women displayed fewer differences across the three cohorts compared to men (Table 4). The urban female vaccine study participants had significantly higher percentage of CD4 T cells (median of 74 versus 72%), but significantly lower percentage and absolute count of NK cells (median of 9 versus 11% and  $184 \times 10^3$  versus  $263 \times 10^3$  cells/ $\mu$ l, respectively) compared to semi-urban blood bank study female participants (Table 4, all  $p < 0.05$ ). The rural Kayunga cohort female participants had a significantly higher percentage of CD4 T cells (median of 46 versus 43%), higher CD4/CD8 ratio ([median of 2.03 versus 1.71], Table 4, both  $p < 0.05$ ), but lower percentage of CD3-expressing cells (median of 71 versus 72%) and CD8 T cells (median of 22 versus 24%) and CD8 absolute counts ([median of  $507 \times 10^3$  versus  $579 \times 10^3$  cells/ $\mu$ l], Table 4, all  $p < 0.05$ ) compared to semi-urban blood bank study female participants. Additionally, women from the rural Kayunga cohort study had a significantly lower percentage of CD8 T cells (median of 22 versus 24%), but significantly higher NK cell percentage (median



**Table 4. Comparison of lymphocyte subset frequency and absolute counts in females.**

| Test                | Semi-Urban (n = 143) |              |                 | Urban (n = 76) |              |                 | Rural (n = 121) |              |                 | Significant Differences Between Groups |
|---------------------|----------------------|--------------|-----------------|----------------|--------------|-----------------|-----------------|--------------|-----------------|----------------------------------------|
|                     | Median               | Mean (StDev) | 2.5–97.5% Range | Median         | Mean (StDev) | 2.5–97.5% Range | Median          | Mean (StDev) | 2.5–97.5% Range |                                        |
| CD3, %              | 72                   | 72 (5.6)     | 60.2–82         | 74             | 73 (5.5)     | 58–81           | 71              | 71 (7.6)     | 53–83           | *U vs R                                |
| CD4, %              | 43                   | 43 (6.5)     | 32–55           | 45             | 45 (5.7)     | 35–56           | 46              | 45 (7.6)     | 31–60           | *SU vs U and *SU vs R                  |
| CD8, %              | 24                   | 25 (5.8)     | 14–36           | 24             | 25 (6.0)     | 13–39           | 22              | 23 (6.4)     | 13–35           | **SU vs R and **U vs R                 |
| NK, %               | 11                   | 12 (4.4)     | 4–21            | 9              | 9.8 (4.0)    | 4–20            | 11              | 12 (6.2)     | 4–26            | *SU vs U and **U vs R                  |
| B, %                | 14                   | 15 (3.4)     | 9–23            | 16             | 15 (3.7)     | 9–23            | 15              | 16 (4.3)     | 8–25            | ND                                     |
| CD3, cells/ $\mu$ l | 1747                 | 1780 (554)   | 924–3160        | 1641           | 1682 (524)   | 702–3082        | 1590            | 1700 (586)   | 787–3549        | ND                                     |
| CD4, cells/ $\mu$ l | 1010                 | 1062 (368)   | 463–2217        | 1011           | 1045 (358)   | 469–2128        | 1024            | 1071 (327)   | 486–1915        | ND                                     |
| CD8, cells/ $\mu$ l | 579                  | 616 (246)    | 255–1276        | 545            | 574 (223)    | 194–1107        | 507             | 557 (349)    | 235–1095        | **SU vs R                              |
| NK, cells/ $\mu$ l  | 263                  | 283 (133)    | 91–638          | 185            | 224 (124)    | 79–636          | 258             | 299 (184)    | 82–758          | ***SU vs U and **U vs R                |
| B, cells/ $\mu$ l   | 362                  | 378 (142)    | 141–747         | 341            | 369 (154)    | 127–881         | 360             | 379 (176)    | 137–815         | ND                                     |
| CD4/CD8 ratio       | 1.7                  | 1.9 (0.7)    | 0.9–3.6         | 1.9            | 2.0 (0.7)    | 1.0–3.9         | 2.0             | 2.2 (0.8)    | 1.1–4.2         | ***SU vs R                             |

Females, SU = Semi-urban, U = Urban, R = Rural,

\*p<0.05,

\*\*p<0.01,

\*\*\*p<0.001,

ND = no difference.

The non-parametric Kruskal-Wallis test, corrected for multiple comparisons using Dunn’s test, was used to determine differences across groups.

doi:10.1371/journal.pone.0146196.t004

of 11 versus 9%) and absolute counts ([median of  $258 \times 10^3$  versus  $184 \times 10^3$  cells/ $\mu$ l], [Table 4](#), all  $p < 0.05$ ) compared to urban female vaccine study participants. Taken together, these data reveal significant differences in female lymphocyte subset distribution across cohorts with varying levels of urbanicity.

### Hematological parameters differ across populations

To further investigate differences in participants across geographically disparate sites, we compared hematological parameters between a subset of 637 blood donors and 121 vaccine study participants, for whom this data was readily available. Stratified by gender, 79% and 71% of the semi-urban blood bank donors and urban vaccine study participants were male, respectively. Men participating in vaccine trials had significantly higher percentages of neutrophils (median of 41.9 versus 38.3%) and basophils (median of 0.9 versus 0.6%), and higher absolute counts of all parameters with the exception of lymphocytes (median of  $2.05 \times 10^3$  versus  $2.09 \times 10^3$  cells/ $\mu$ l) and eosinophils (median of  $0.18 \times 10^3$  versus  $0.26 \times 10^3$  cells/ $\mu$ l) compared to semi-urban male blood donors ([Fig 1](#); all  $p < 0.05$ ). Percentages of lymphocytes and eosinophils were significantly lower in urban men participating in the vaccine trials compared to male blood donors (median of 39.9 versus 44.4% and 3.75 versus 5.6%, all  $p < 0.05$ ). Consistent with lymphocyte subset parameters, women had fewer hematological differences between cohort populations compared to male counterparts, with women participating in vaccine trials having higher basophil percentage and absolute counts (median of 40 and 30 cells/ $\mu$ l, respectively) and red blood cells

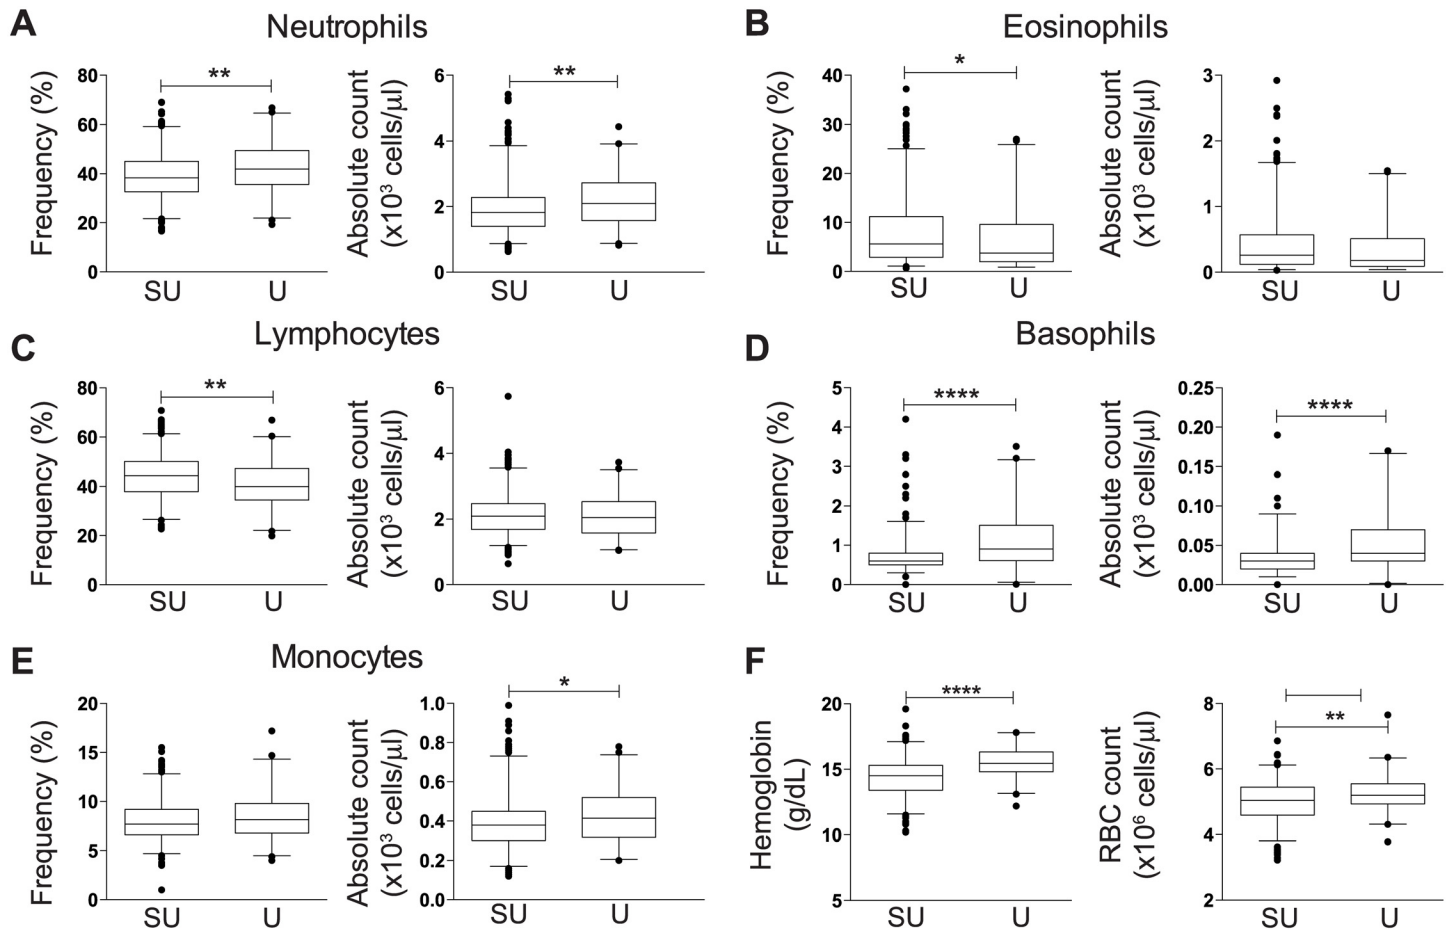

**Fig 1. Comparison of hematological parameter frequency and absolute counts in males.** Box and whisker plots showing median and 2.5–97.5 percentiles of (A) neutrophils in semi-urban blood bank donors [SU] and vaccine trial [U]; (B) eosinophils; (C) lymphocytes; (D) basophils; (E) B monocytes; and (F) hemoglobin levels and RBC counts. The non-parametric Mann Whitney U test was used to determine any statistically significant differences between cohorts; \*p<0.05, \*\*p<0.01, \*\*\*p<0.001, \*\*\*\*p<0.0001.

doi:10.1371/journal.pone.0146196.g001

([RBC], median of 4.4x10<sup>6</sup> and 4.68x10<sup>6</sup> cells/μl, respectively) compared to semi-urban female blood donors (Fig 2, all p<0.05).

### Age associates positively with CD4%, red blood cell count, and hemoglobin levels in women

We next investigated whether the age of a participant was associated with the lymphocyte and hematological parameters. For this purpose we pooled the data from all cohort studies, and analysed by gender (Fig 3). Age of female participants correlated weakly with the frequency of CD4 T cell lymphocytes (Fig 3A; rho = 0.25, p<0.001), RBC count (Fig 3B; rho = 0.32, p<0.001) and hemoglobin (Hgb) level (Fig 3C; rho = 0.39, p<0.001). No such associations were observed among the men, and none of the other parameters correlated with age in either sex. Despite the few associations observed, our data suggests that age is not the primary factor driving diversity in the lymphocyte and hematological parameters measured within these cohorts.



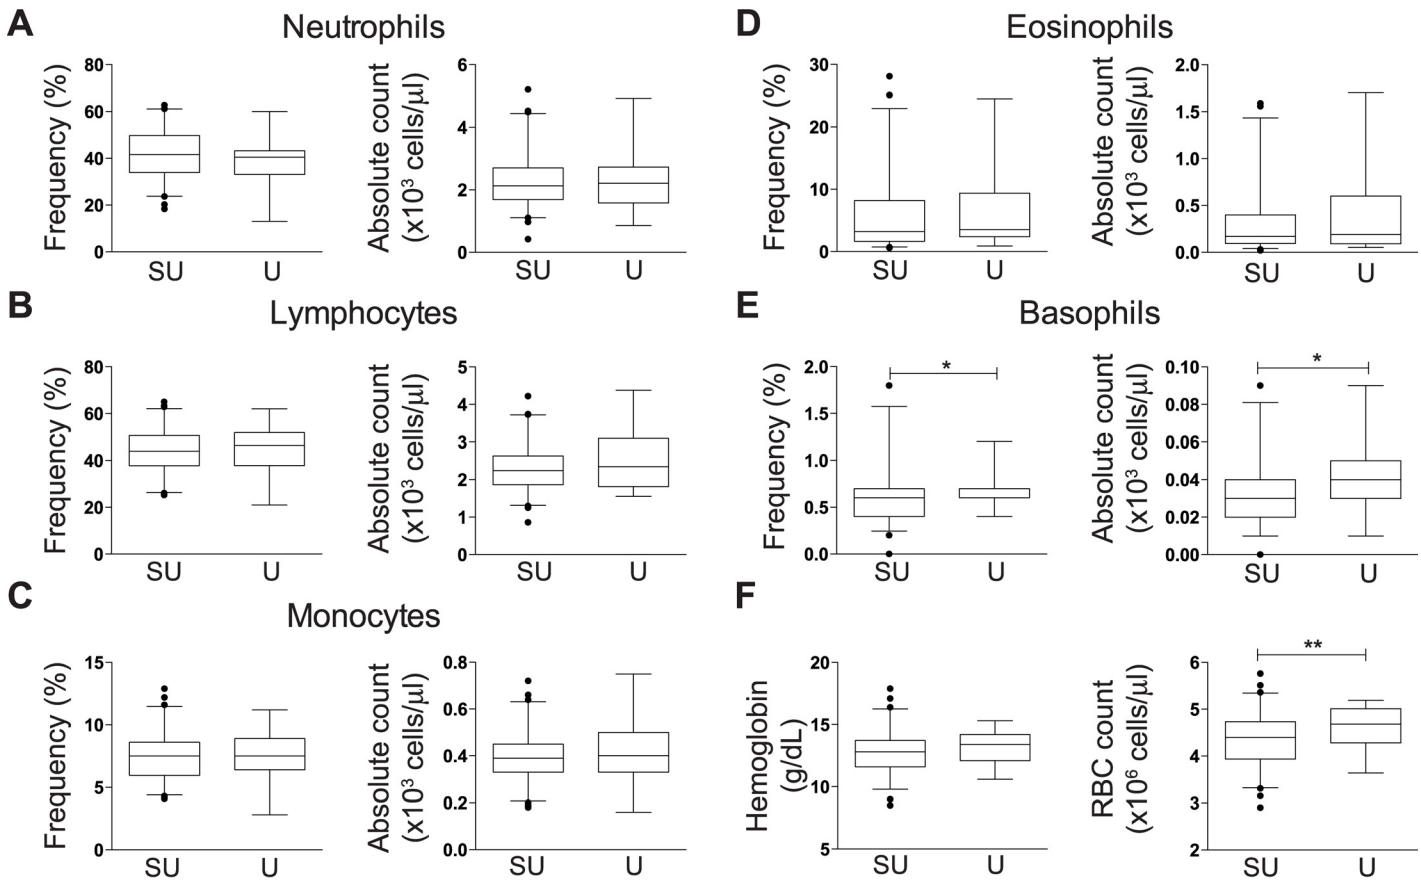

**Fig 2. Comparison of hematological parameter frequency and absolute counts in females.** Box and whisker plots showing median and 2.5–97.5 percentiles of (A) neutrophils in semi-urban blood bank donors [SU] and vaccine trial [U]; (B) eosinophils; (C) lymphocytes; (D) basophils; (E) B monocytes; and (F) hemoglobin levels and RBC counts. The non-parametric Mann Whitney U test was used to determine any statistically significant differences between cohorts; \* $p < 0.05$ , \*\* $p < 0.01$ , \*\*\* $p < 0.001$ , \*\*\*\* $p < 0.0001$ .

doi:10.1371/journal.pone.0146196.g002

### Eosinophil and basophil counts associate with CD3 T cell counts

We further investigated if the hematological data was associated with the lymphocyte data. Again, we combined the participant data from all studies and analysed by sex. In men, eosinophil and basophil counts correlated positively, albeit weakly, with absolute CD3 T cell counts (Fig 3D,  $\rho = 0.26$  and 3E,  $\rho = 0.36$ ;  $p < 0.001$ , respectively), whereas in women, only basophil count correlated positively with absolute CD3 T cell counts (Fig 3E,  $\rho = 0.55$ ,  $p < 0.001$ ). Interestingly, basophil counts were positively associated with the absolute CD4 and CD8 T cell counts regardless of sex, but not with age (Fig 4A and 4B,  $p < 0.001$  respectively). In addition, the basophil count correlated positively with the absolute B cell count in women, but not men (Fig 4C,  $p < 0.001$ ). Taken together, our data reveals positive associations between granulocyte and T cell parameters in healthy Ugandans regardless of sex.

### Discussion

Sub-Saharan Africa continues to struggle with a disproportionately high burden of both infectious and parasitic diseases [1]. As a result, clinical trials to assess preventive and therapeutic interventions are increasingly being conducted [2]. It is imperative that data generated are representative of the studied population and interpreted accordingly [16]. Furthermore,

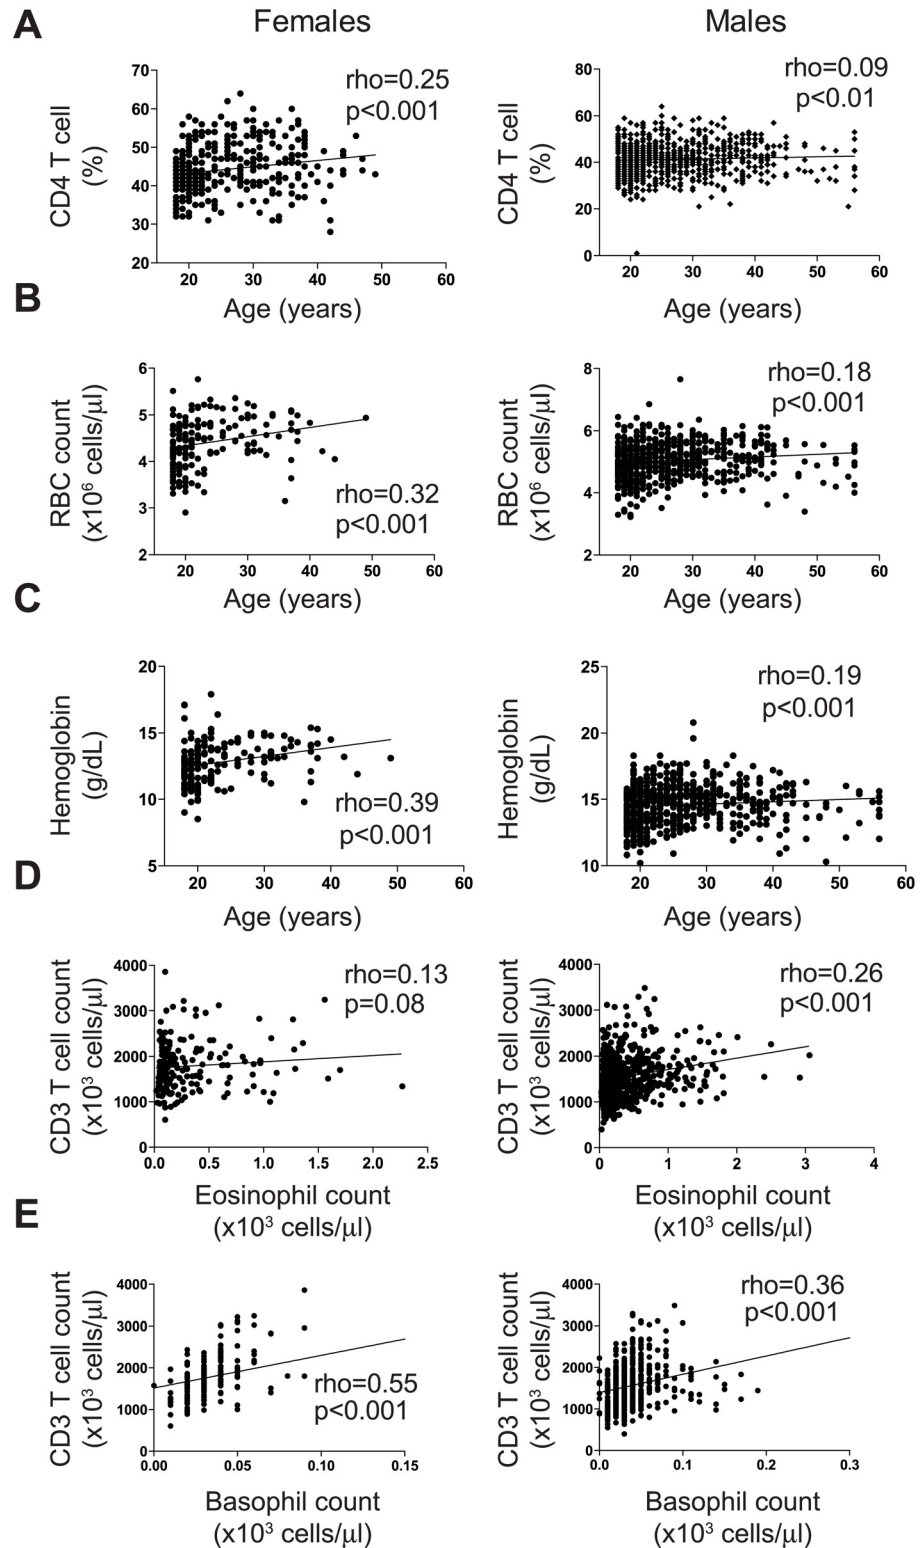

**Fig 3. Association between age, lymphocytes and hematological parameters.** Correlation graphs of (A) Age and CD4 T cell frequency; (B) Age and RBC count; (C) Age and hemoglobin levels; (D) eosinophil and CD3 T cell counts; and (E) basophil and CD3 T cell counts. The Spearman's rank correlation was used to assess associations between parameters, with  $\rho \geq 0.25$  and  $p$  values  $< 0.05$  considered statistically significant.

doi:10.1371/journal.pone.0146196.g003

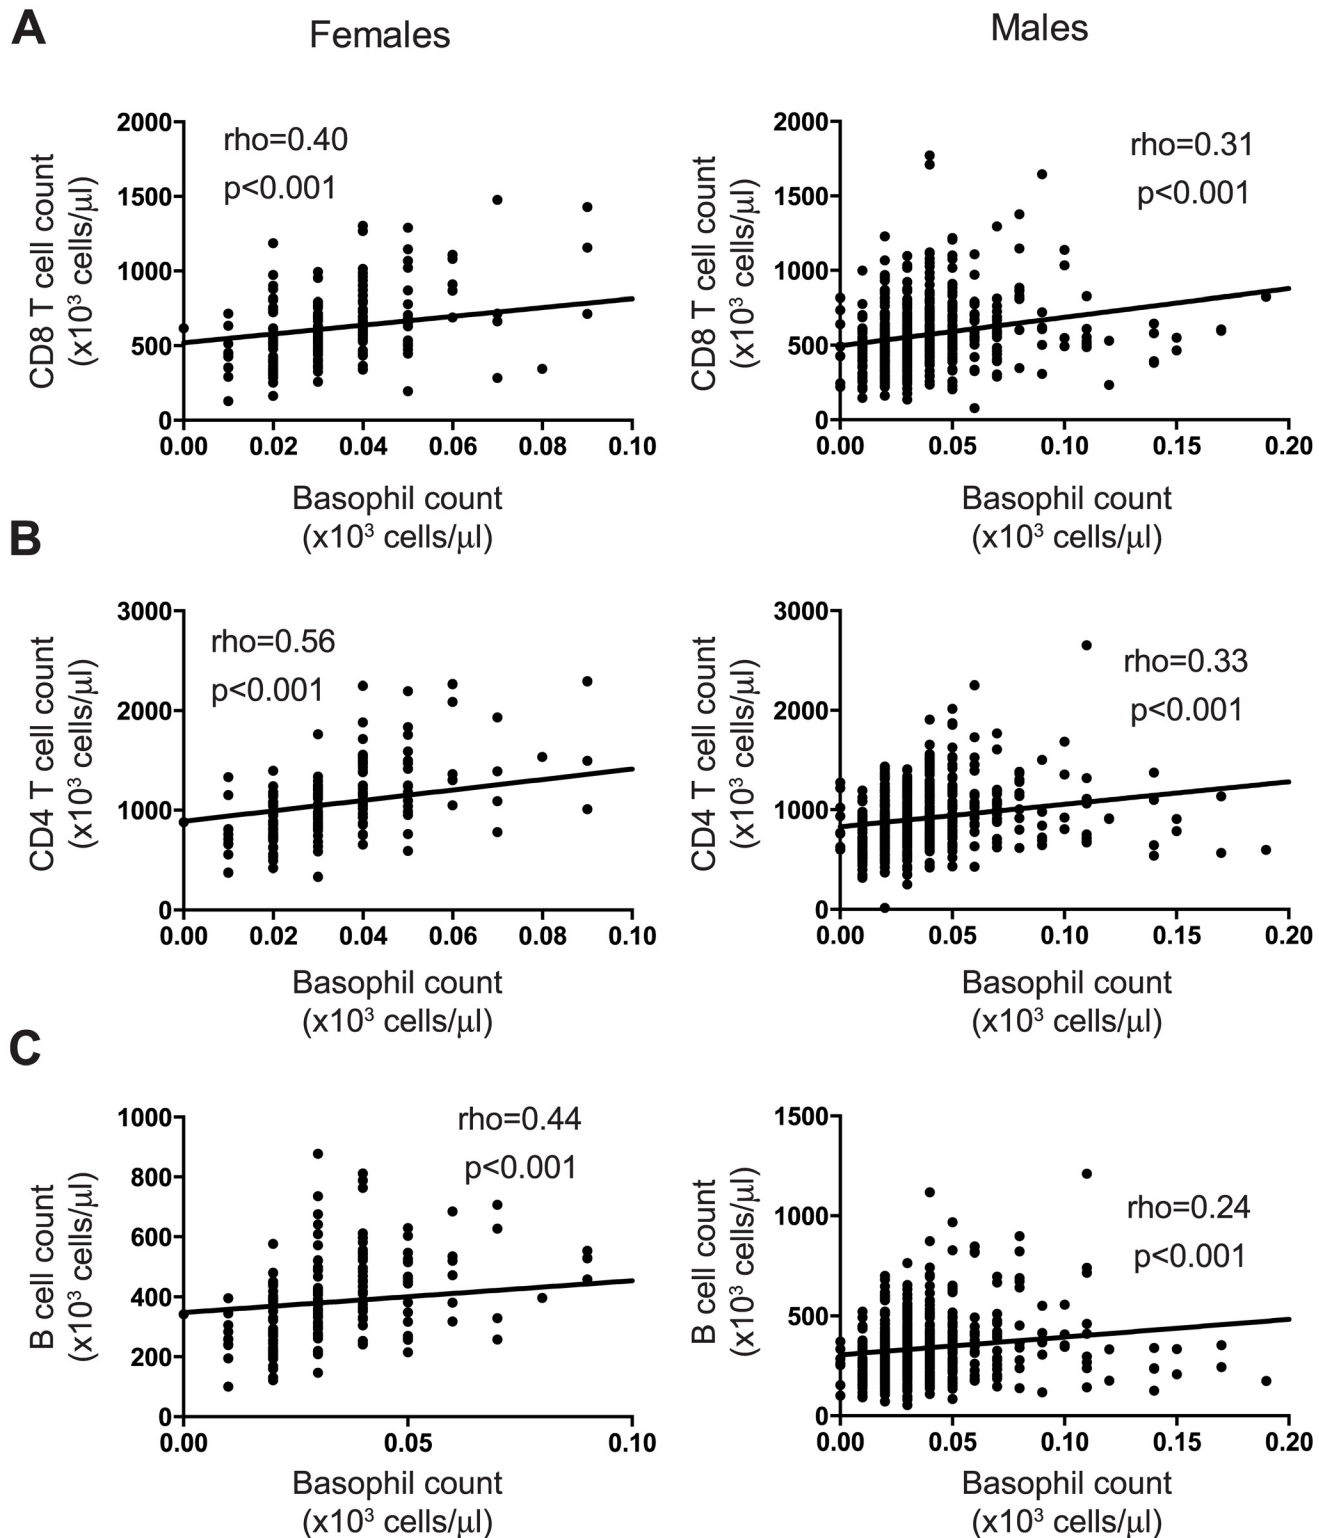

**Fig 4. Associations between lymphocyte and basophil counts.** Correlation graphs of (A) basophil and CD8 T cell counts; (B) basophil and CD4 T cell counts; and (C) basophil and B cell counts. The Spearman's rank correlation was used to assess associations between parameters, with  $\rho \geq 0.25$  and  $p$  values  $< 0.05$  considered statistically significant.

doi:10.1371/journal.pone.0146196.g004

understanding differences in the cellular composition of the immune system and thus also immunological reference ranges between groups, regions and countries can help researchers correctly interpret data obtained from studies of infectious diseases, as well as studies of novel vaccines and therapeutic interventions. To this end, we set out to establish clinical laboratory reference ranges for peripheral blood lymphocytes in Ugandans using anonymous healthy blood bank donors. Previous studies were either decades old [5], used dual platform technology thus increasing the margin of error [4], or combined data from different African countries [6]. We show that some healthy participants have 'low' CD4 T cell absolute counts, which has public health implications for HIV management [17]. To our knowledge, the present study is the first to report on NK cell and B cell lymphocyte counts in Ugandans.

Interestingly, we found that women had significantly higher lymphocyte frequencies and absolute counts in almost all subsets with the exception of NK cells, where they had less than men. This is in agreement with other studies done in Uganda and elsewhere, for T cell subsets [4–6, 9, 18–21]. Also, immunological differences between male and female children have previously been observed, albeit not consistently [20–23]. The underlying basis for this sex difference has not been elucidated, however variance in the normal ranges of lymphocyte subsets may contribute to differential immune responses to infection, vaccination, or treatment. For example, men and women display differences in immune response to vaccination [24], susceptibility to infectious and parasitic diseases [25, 26], immune responses to infection [27, 28] and treatment [29], immune-mediated pathology and autoimmune disease [25, 30, 31] and mortality [32]. These differences involve both innate and adaptive immune cells, and vary according to the geographic location of the study, suggesting that the sex differences observed in lymphocyte subsets may have clinical significance.

Currently, several HIV therapeutic clinical trials are being conducted in more than one region of Uganda [2]. The successful evaluation of clinical interventions requires clinical laboratory ranges that reflect the population in which these interventions are targeted. We compared lymphocyte data obtained from healthy blood bank donors to data generated from two other studies conducted in different Ugandan locations. Surprisingly, not only were there significant lymphocyte subset differences between the rural (Kayunga) and urban (Kampala) populations, but the blood bank donors, a semi-urban population, demonstrated significantly different lymphocyte frequencies compared to urban vaccine study participants. Additionally, urban vaccine study participants demonstrated higher granulocyte counts. Here we show that, consistent with other studies in Africa [6, 21, 23, 33], and elsewhere [21, 34] populations in different geographic locations may have statistically significant differences in lymphocyte and other hematological parameters. The reason for this variation across Ugandan populations remains unclear. Possible factors include diurnal variation, altitude, nutrition, socio-economic status, environment [6, 18, 20, 33, 35], genetics [22, 36] or seasonal effects [37]. Kayunga is located 110 km northeast of Kampala but is only 120 m lower in altitude (1070 m versus 1190 m, respectively) and both are malaria-endemic areas, thus these factors are unlikely to influence these results. Peripheral blood T cell counts have been shown to be stable during the day [38] while seasons have minimal to no impact [37]. Notably, all three populations were heterogeneous as regards to tribe, and thus genetics. Additionally, vaccine study participants achieved consistently higher education levels compared to blood bank donors living in semi-urban Kampala areas, where both lower and higher educated individuals were observed. The rural cohort in Kayunga mostly enrolled participants with limited education and menial jobs. Therefore nutrition, socio-economic status and composition of the intestinal microflora may contribute to the differences in peripheral blood indices, despite geographical similarity between these groups [4, 18, 22]. Future studies should explore the relative impact of environmental factors to better understand the mechanistic basis in immune cell subset variation. Additionally,

incorporating a more detailed health evaluation and history of individuals, in the context of the immunologic differences, should be considered to assess the clinical relevance of our observations.

It was interesting to find that in women, the frequency of CD4 T cells, RBC count and Hgb levels increased modestly with age, whereas in males there was no such relationship. This is in contrast with other studies in Uganda [4] and Western Kenya [19], particularly in males, which underscores the differences in populations at different locations. It has been shown that sex hormones play a role in immune responses and influence the outcome of infection [27]. Blood loss due to menstruation [39], sub-optimal nutrition and pregnancy [40] could possibly contribute to these age patterns in women. Das *et al* recently found that iron deficiency was associated with lower CD4 T cell counts in children in India [41]. Notably, we did not find an association of CD4 T cell counts with either RBC counts or Hgb levels. Further work is needed to elucidate the observed CD4 T cell and age association.

Granulocytes are studied for their role in allergic conditions, in addition to immune defence against parasitic infections [42] common to sub Saharan Africa [6]. To our knowledge, the present study is the first to show a positive correlation between eosinophil and basophil counts with T and/or B cell counts. It is becoming more apparent that granulocytes, through their innate production of cytokines, play important roles not only in host defence but also in directing and regulating adaptive immune responses [42–44]. A detailed study to elucidate these relationships in the context of populations with high parasitic burden is warranted.

Our study, using heterogeneous populations of blood bank donors, vaccine study volunteers, and research cohort participants, has evaluated factors that contribute to lymphocyte distribution in Ugandans, to include T cells, NK cells and B cells. We describe significant differences between the sexes in most lymphocyte subsets with women having more CD4 T cells and men having higher levels of NK cells. Furthermore, we have shown that even within the same country there are differences in lymphocyte and hematological parameters between cohorts in different locations. A limitation of our study is that we did not screen for all the medical conditions that could impact on the laboratory data, although we followed the procedure used to screen potential volunteers for clinical trials in Uganda [10]. Increasing epidemiological evidence supports the notion that sex and geographic location may impact morbidity and mortality in disease and immune response to vaccination [32, 35, 36]. Well-controlled biological studies are needed to definitively answer this question, so as to guide both clinical trial design and public health strategies.

## Acknowledgments

The authors would like to thank the study volunteers for their participation and invaluable support of this research in Uganda, Warren B. Sateren for his help on the statistical analysis, and the MUWRP laboratory staff for their dedicated work on this. The views expressed are those of the authors and should not be construed to represent the positions of the U.S. Army or the Department of Defence.

## Author Contributions

Conceived and designed the experiments: PK DG HK LAE FWM NLM MLR MSD MAE. Performed the experiments: PN BJO DK. Analyzed the data: PN LAE MSD JKS MAE. Contributed reagents/materials/analysis tools: PK DG HK. Wrote the paper: PN JKS MAE. Reviewed the manuscript and provided comments: PN LAE BJO DK PK DG HK FWM MLR NLM MSD JKS MAE.



## References

1. WHO. World health statistics 2014. Geneva: World Health Organization; 2014. p. 180.
2. NIH. Available: <https://clinicaltrials.gov/ct2/results?term=Uganda&recr=Open&pg=2>; ClinicalTrials.gov; 2014. Accessed cited 05September 2014.
3. WHO. Clinical guidance across the continuum of care: antiretroviral therapy. Monitoring access to ART and the diagnosis of treatment failure: Laboratory monitoring before and after initiating ART. Geneva: World Health Organisation; 2013. p. 1.
4. Lugada ES, Mermin J, Kaharuza F, Ulvestad E, Were W, Langeland N, et al. Population-Based Hematologic and Immunologic Reference Values for a Healthy Ugandan Population. *Clinical and Vaccine Immunology*. 2004; 11(1):29–34. doi: [10.1128/cdli.11.1.29-34.2004](https://doi.org/10.1128/cdli.11.1.29-34.2004)
5. Tugume SB, Piwowar EM, Lutalo T, Mugenyi PN, Grant RM, Mangeni FW, et al. Hematological reference ranges among healthy Ugandans. *Clinical and diagnostic laboratory immunology*. 1995; 2(2):233–5. Epub 1995/03/01. PMID: [7697535](https://pubmed.ncbi.nlm.nih.gov/7697535/); PubMed Central PMCID: PMC2632744.
6. Karita E, Ketter N, Price MA, Kayitenkore K, Kaleebu P, Nanvubya A, et al. CLSI-derived hematology and biochemistry reference intervals for healthy adults in eastern and southern Africa. *PLOS one*. 2009; 4(2):e4401. Epub 2009/02/07. doi: [10.1371/journal.pone.0004401](https://doi.org/10.1371/journal.pone.0004401) PMID: [19197365](https://pubmed.ncbi.nlm.nih.gov/19197365/); PubMed Central PMCID: PMC2632744.
7. Vaucher P. Designing phase III or IV trials for vaccines: choosing between individual or cluster randomised trial designs. *Vaccine*. 2009; 27(13):1928–31. doi: [10.1016/j.vaccine.2009.01.107](https://doi.org/10.1016/j.vaccine.2009.01.107) PMID: [19368773](https://pubmed.ncbi.nlm.nih.gov/19368773/).
8. Eller LA, Eller MA, Ouma B, Kataaha P, Kyabaggu D, Tumusiime R, et al. Reference intervals in healthy adult Ugandan blood donors and their impact on conducting international vaccine trials. *PLOS one*. 2008; 3(12):e3919. doi: [10.1371/journal.pone.0003919](https://doi.org/10.1371/journal.pone.0003919) PMID: [19079547](https://pubmed.ncbi.nlm.nih.gov/19079547/); PubMed Central PMCID: PMC2593783.
9. Kibaya RS, Bautista CT, Sawe FK, Shaffer DN, Sateren WB, Scott PT, et al. Reference ranges for the clinical laboratory derived from a rural population in Kericho, Kenya. *PLOS one*. 2008; 3(10):e3327. doi: [10.1371/journal.pone.0003327](https://doi.org/10.1371/journal.pone.0003327) PMID: [18833329](https://pubmed.ncbi.nlm.nih.gov/18833329/); PubMed Central PMCID: PMC2553265.
10. Stevens W, Kamali A, Karita E, Anzala O, Sanders EJ, Jaoko W, et al. Baseline morbidity in 2,990 adult African volunteers recruited to characterize laboratory reference intervals for future HIV vaccine clinical trials. *PLOS one*. 2008; 3(4):e2043. Epub 2008/05/01. doi: [10.1371/journal.pone.0002043](https://doi.org/10.1371/journal.pone.0002043) PMID: [18446196](https://pubmed.ncbi.nlm.nih.gov/18446196/); PubMed Central PMCID: PMC2312327.
11. UBTS. Available: [http://ubts.go.ug/index.php?option=com\\_content&view=article&id=9&Itemid=11](http://ubts.go.ug/index.php?option=com_content&view=article&id=9&Itemid=11) Kampala: Uganda Blood Transfusion Service, Ministry of Health; 2014. Accessed 10 November 2014.
12. Eller MA, Eller LA, Opollo MS, Ouma BJ, Oballah PO, Galley L, et al. Induction of HIV-specific functional immune responses by a multiclade HIV-1 DNA vaccine candidate in healthy Ugandans. *Vaccine*. 2007; 25(45):7737–42. Epub 2007/10/09. doi: [10.1016/j.vaccine.2007.08.056](https://doi.org/10.1016/j.vaccine.2007.08.056) PMID: [17920731](https://pubmed.ncbi.nlm.nih.gov/17920731/).
13. Kibuuka H, Kimutai R, Maboko L, Sawe F, Schunk MS, Kroidl A, et al. A phase 1/2 study of a multiclade HIV-1 DNA plasmid prime and recombinant adenovirus serotype 5 boost vaccine in HIV-Uninfected East Africans (RV 172). *The Journal of infectious diseases*. 2010; 201(4):600–7. Epub 2010/01/19. doi: [10.1086/650299](https://doi.org/10.1086/650299) PMID: [20078213](https://pubmed.ncbi.nlm.nih.gov/20078213/); PubMed Central PMCID: PMC2811694.
14. Eller LA, Eller MA, Ouma BJ, Kataaha P, Bagaya BS, Olemukan RL, et al. Large-scale human immunodeficiency virus rapid test evaluation in a low-prevalence ugandan blood bank population. *Journal of clinical microbiology*. 2007; 45(10):3281–5. Epub 2007/08/19. doi: [10.1128/jcm.00894-07](https://doi.org/10.1128/jcm.00894-07) PMID: [17699650](https://pubmed.ncbi.nlm.nih.gov/17699650/); PubMed Central PMCID: PMC2045340.
15. Guwatudde D, Wabwire-Mangen F, Eller LA, Eller M, McCutchan F, Kibuuka H, et al. Relatively low HIV infection rates in rural Uganda, but with high potential for a rise: a cohort study in Kayunga District, Uganda. *PLOS one*. 2009; 4(1):e4145. Epub 2009/01/08. doi: [10.1371/journal.pone.0004145](https://doi.org/10.1371/journal.pone.0004145) PMID: [19127290](https://pubmed.ncbi.nlm.nih.gov/19127290/); PubMed Central PMCID: PMC2607541.
16. NCCLS. How to define and determine reference intervals in the clinical laboratory; approved guideline—second edition NCCLS document C28-A2. Wayne, Pennsylvania, USA: National Committee on Clinical Laboratory Standards; 2000. p. 59.
17. WHO. Consolidated guidelines: use of ARV drugs for treating and preventing HIV infection. Summary of new recommendations. Geneva: World Health Organisation; 2013. p. 9.
18. Saathoff E, Schneider P, Kleinfeldt V, Geis S, Haule D, Maboko L, et al. Laboratory reference values for healthy adults from southern Tanzania. *Tropical medicine & international health: TM & IH*. 2008; 13(5):612–25. doi: [10.1111/j.1365-3156.2008.02047.x](https://doi.org/10.1111/j.1365-3156.2008.02047.x) PMID: [18331386](https://pubmed.ncbi.nlm.nih.gov/18331386/).
19. Zeh C, Amornkul PN, Inzaule S, Ondoa P, Oyaro B, Mwaengo DM, et al. Population-based biochemistry, immunologic and hematological reference values for adolescents and young adults in a rural



- population in Western Kenya. *PLOS one*. 2011; 6(6):e21040. doi: [10.1371/journal.pone.0021040](https://doi.org/10.1371/journal.pone.0021040) PMID: [21713038](https://pubmed.ncbi.nlm.nih.gov/21713038/); PubMed Central PMCID: PMC3119664.
20. Garcia-Dabrio MC, Pujol-Moix N, Martinez-Perez A, Fontcuberta J, Souto JC, Soria JM, et al. Influence of age, gender and lifestyle in lymphocyte subsets: report from the Spanish Gait-2 Study. *Acta haematologica*. 2012; 127(4):244–9. Epub 2012/04/28. doi: [10.1159/000337051](https://doi.org/10.1159/000337051) PMID: [22538526](https://pubmed.ncbi.nlm.nih.gov/22538526/).
  21. Torres AJ, Angelo AL, Silva MO, Bastos Mde C, Souza DF, Inocencio LA, et al. Establishing the reference range for T lymphocytes subpopulations in adults and children from Brazil. *Revista do Instituto de Medicina Tropical de Sao Paulo*. 2013; 55(5):323–8. doi: [10.1590/S0036-46652013000500005](https://doi.org/10.1590/S0036-46652013000500005) PMID: [24037286](https://pubmed.ncbi.nlm.nih.gov/24037286/); PubMed Central PMCID: PMC4105069.
  22. Bunders M, Lugada E, Mermin J, Downing R, Were W, Thorne C, et al. Within and between race differences in lymphocyte, CD4+, CD8+ and neutrophil levels in HIV-uninfected children with or without HIV exposure in Europe and Uganda. *Annals of tropical paediatrics*. 2006; 26(3):169–79. doi: [10.1179/146532806X120255](https://doi.org/10.1179/146532806X120255) PMID: [16925953](https://pubmed.ncbi.nlm.nih.gov/16925953/).
  23. Afolabi JK, Fadeyi A, Desalu OO, Durotoye IA, Fawibe AE, Adeboye MA, et al. Normal CD4 Count Range among Healthy Nigerian Population in Ilorin. *Journal of the International Association of Providers of AIDS Care*. 2014. doi: [10.1177/2325957414530472](https://doi.org/10.1177/2325957414530472) PMID: [24842948](https://pubmed.ncbi.nlm.nih.gov/24842948/).
  24. Klein SL, Jedlicka A, Pekosz A. The Xs and Y of immune responses to viral vaccines. *The Lancet Infectious diseases*. 2010; 10(5):338–49. Epub 2010/04/27. doi: [10.1016/s1473-3099\(10\)70049-9](https://doi.org/10.1016/s1473-3099(10)70049-9) PMID: [20417416](https://pubmed.ncbi.nlm.nih.gov/20417416/).
  25. Bernin H, Lotter H. Sex bias in the outcome of human tropical infectious diseases: influence of steroid hormones. *The Journal of infectious diseases*. 2014; 209 Suppl 3:S107–13. doi: [10.1093/infdis/jit610](https://doi.org/10.1093/infdis/jit610) PMID: [24966190](https://pubmed.ncbi.nlm.nih.gov/24966190/).
  26. van Lunzen J, Altfeld M. Sex differences in infectious diseases-common but neglected. *The Journal of infectious diseases*. 2014; 209 Suppl 3:S79–80. doi: [10.1093/infdis/jiu159](https://doi.org/10.1093/infdis/jiu159) PMID: [24966193](https://pubmed.ncbi.nlm.nih.gov/24966193/).
  27. Fish EN. The X-files in immunity: sex-based differences predispose immune responses. *Nature reviews Immunology*. 2008; 8(9):737–44. Epub 2008/08/30. doi: [10.1038/nri2394](https://doi.org/10.1038/nri2394) PMID: [18728636](https://pubmed.ncbi.nlm.nih.gov/18728636/).
  28. McClelland EE, Hobbs LM, Rivera J, Casadevall A, Potts WK, Smith JM, et al. The role of host gender in the pathogenesis of *Cryptococcus neoformans* infections. *PLOS one*. 2013; 8(5):e63632. doi: [10.1371/journal.pone.0063632](https://doi.org/10.1371/journal.pone.0063632) PMID: [23741297](https://pubmed.ncbi.nlm.nih.gov/23741297/); PubMed Central PMCID: PMC3669355.
  29. Sempa JB, Kiragga AN, Castelnuovo B, Kamya MR, Manabe YC. Among patients with sustained viral suppression in a resource-limited setting, CD4 gains are continuous although gender-based differences occur. *PLOS one*. 2013; 8(8):e73190. doi: [10.1371/journal.pone.0073190](https://doi.org/10.1371/journal.pone.0073190) PMID: [24013838](https://pubmed.ncbi.nlm.nih.gov/24013838/); PubMed Central PMCID: PMC3754935.
  30. Muenchhoff M, Goulder PJ. Sex differences in pediatric infectious diseases. *The Journal of infectious diseases*. 2014; 209 Suppl 3:S120–6. doi: [10.1093/infdis/jiu232](https://doi.org/10.1093/infdis/jiu232) PMID: [24966192](https://pubmed.ncbi.nlm.nih.gov/24966192/); PubMed Central PMCID: PMC4072001.
  31. Addo MM, Altfeld M. Sex-based differences in HIV type 1 pathogenesis. *The Journal of infectious diseases*. 2014; 209 Suppl 3:S86–92. doi: [10.1093/infdis/jiu175](https://doi.org/10.1093/infdis/jiu175) PMID: [24966195](https://pubmed.ncbi.nlm.nih.gov/24966195/).
  32. Garenne M. Demographic evidence of sex differences in vulnerability to infectious diseases. *The Journal of infectious diseases*. 2014. Epub 2014/08/13. doi: [10.1093/infdis/jiu448](https://doi.org/10.1093/infdis/jiu448) PMID: [25114159](https://pubmed.ncbi.nlm.nih.gov/25114159/).
  33. Abuye C, Tsegaye A, West CE, Versloot P, Sanders EJ, Wolday D, et al. Determinants of CD4 Counts Among HIV-Negative Ethiopians: Role of Body Mass Index, Gender, Cigarette Smoking, Khat (*Catha Edulis*) Chewing, and Possibly Altitude? *J Clin Immunol*. 2005; 25(2):127–33. doi: [10.1007/s10875-005-2818-y](https://doi.org/10.1007/s10875-005-2818-y) PMID: [15821889](https://pubmed.ncbi.nlm.nih.gov/15821889/)
  34. Meditz AL, MaWhinney S, Allshouse A, Feser W, Markowitz M, Little S, et al. Sex, race, and geographic region influence clinical outcomes following primary HIV-1 infection. *The Journal of infectious diseases*. 2011; 203(4):442–51. Epub 2011/01/20. doi: [10.1093/infdis/jiq085](https://doi.org/10.1093/infdis/jiq085) PMID: [21245157](https://pubmed.ncbi.nlm.nih.gov/21245157/); PubMed Central PMCID: PMC3071223.
  35. Köllmann TR. Variation between Populations in the Innate Immune Response to Vaccine Adjuvants. *Frontiers in immunology*. 2013; 4:81. doi: [10.3389/fimmu.2013.00081](https://doi.org/10.3389/fimmu.2013.00081) PMID: [23565115](https://pubmed.ncbi.nlm.nih.gov/23565115/); PubMed Central PMCID: PMC3613898.
  36. Smolen KK, Cai B, Gelinas L, Fortuno ES 3rd, Larsen M, Speert DP, et al. Single-Cell Analysis of Innate Cytokine Responses to Pattern Recognition Receptor Stimulation in Children across Four Continents. *Journal of immunology*. 2014. doi: [10.4049/jimmunol.1400895](https://doi.org/10.4049/jimmunol.1400895) PMID: [25135829](https://pubmed.ncbi.nlm.nih.gov/25135829/).
  37. Ruzagira E, Abaasa A, Karita E, Mulenga J, Kilembe W, Allen S, et al. Effect of Seasonal Variation on Adult Clinical Laboratory Parameters in Rwanda, Zambia, and Uganda: Implications for HIV Biomedical Prevention Trials. *PLOS one*. 2014; 9(8):e105089. Epub 2014/08/15. doi: [10.1371/journal.pone.0105089](https://doi.org/10.1371/journal.pone.0105089) PMID: [25118593](https://pubmed.ncbi.nlm.nih.gov/25118593/); PubMed Central PMCID: PMC4132051.

38. Kirsch S, Thijssen S, Alarcon Salvador S, Heine G, van Bentum K, Fliser D, et al. T-cell Numbers and Antigen-specific T-cell Function Follow Different Circadian Rhythms. *J Clin Immunol*. 2012; 32(6):1381–9. doi: [10.1007/s10875-012-9730-z](https://doi.org/10.1007/s10875-012-9730-z) PMID: [22797814](https://pubmed.ncbi.nlm.nih.gov/22797814/)
39. Toxqui L, Perez-Granados AM, Blanco-Rojo R, Wright I, Vaquero MP. A simple and feasible questionnaire to estimate menstrual blood loss: relationship with hematological and gynecological parameters in young women. *BMC women's health*. 2014; 14:71. doi: [10.1186/1472-6874-14-71](https://doi.org/10.1186/1472-6874-14-71) PMID: [24886470](https://pubmed.ncbi.nlm.nih.gov/24886470/); PubMed Central PMCID: PMC4046034.
40. Coad J, Conlon C. Iron deficiency in women: assessment, causes and consequences. *Current opinion in clinical nutrition and metabolic care*. 2011; 14(6):625–34. doi: [10.1097/MCO.0b013e32834be6fd](https://doi.org/10.1097/MCO.0b013e32834be6fd) PMID: [21934611](https://pubmed.ncbi.nlm.nih.gov/21934611/).
41. Das I, Saha K, Mukhopadhyay D, Roy S, Raychaudhuri G, Chatterjee M, et al. Impact of iron deficiency anemia on cell-mediated and humoral immunity in children: A case control study. *Journal of natural science, biology, and medicine*. 2014; 5(1):158–63. doi: [10.4103/0976-9668.127317](https://doi.org/10.4103/0976-9668.127317) PMID: [24678217](https://pubmed.ncbi.nlm.nih.gov/24678217/); PubMed Central PMCID: PMC3961924.
42. Geering B, Stoeckle C, Conus S, Simon HU. Living and dying for inflammation: neutrophils, eosinophils, basophils. *Trends in immunology*. 2013; 34(8):398–409. doi: [10.1016/j.it.2013.04.002](https://doi.org/10.1016/j.it.2013.04.002) PMID: [23665135](https://pubmed.ncbi.nlm.nih.gov/23665135/).
43. Furuta GT, Atkins FD, Lee NA, Lee JJ. Changing roles of eosinophils in health and disease. *Annals of allergy, asthma & immunology: official publication of the American College of Allergy, Asthma, & Immunology*. 2014; 113(1):3–8. doi: [10.1016/j.anai.2014.04.002](https://doi.org/10.1016/j.anai.2014.04.002) PMID: [24795292](https://pubmed.ncbi.nlm.nih.gov/24795292/); PubMed Central PMCID: PMC4065823.
44. Karasuyama H, Yamanishi Y. Basophils have emerged as a key player in immunity. *Current opinion in immunology*. 2014; 31C:1–7. doi: [10.1016/j.coi.2014.07.004](https://doi.org/10.1016/j.coi.2014.07.004) PMID: [25086241](https://pubmed.ncbi.nlm.nih.gov/25086241/).
